# Supplementary material for: OsPG1 encodes a polygalacturonase that determines cell wall architecture and affects resistance to bacterial blight pathogen in rice
Source: Research Square preprint supplement (doi:10.21203/rs.3.rs-66825/v2), 2021-01-25
Supplement: Supplementary file 1 [file ccd082590ff1e11a391c6d1b.docx]

**
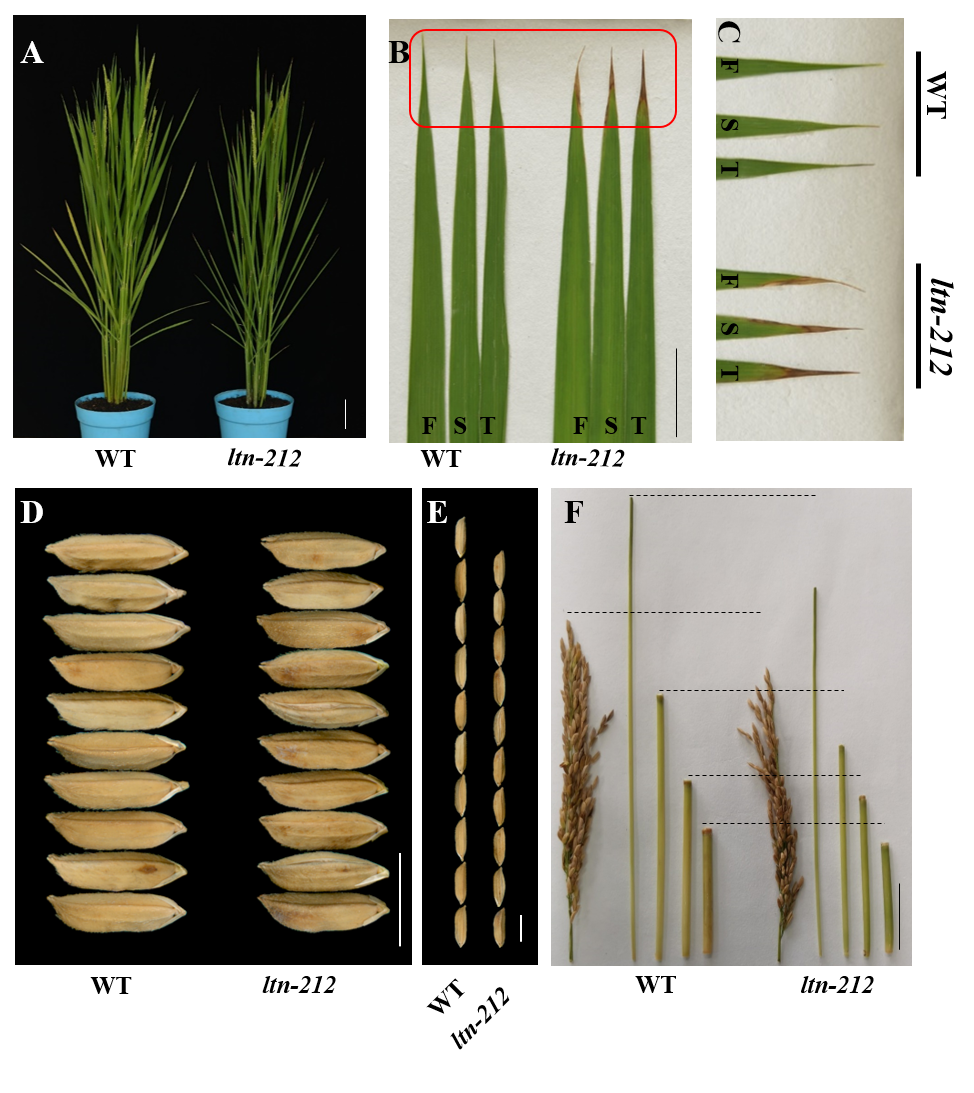
**

**Fig. 1 Leaf tip necrosis** **and** **agronomic traits of *ltn-212***


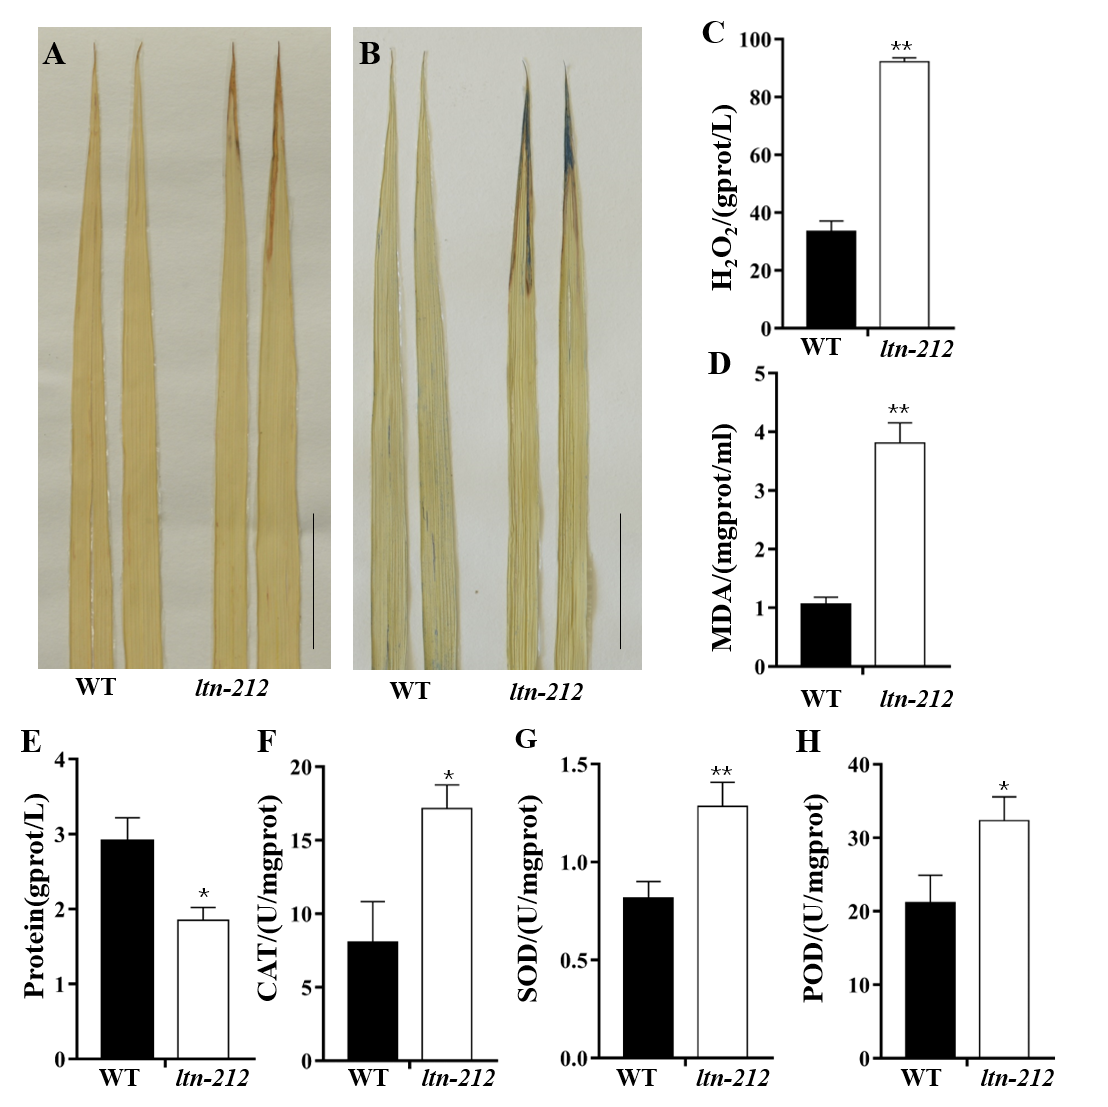


**Figure. 2 Histochemical staining of WT and *ltn-212***


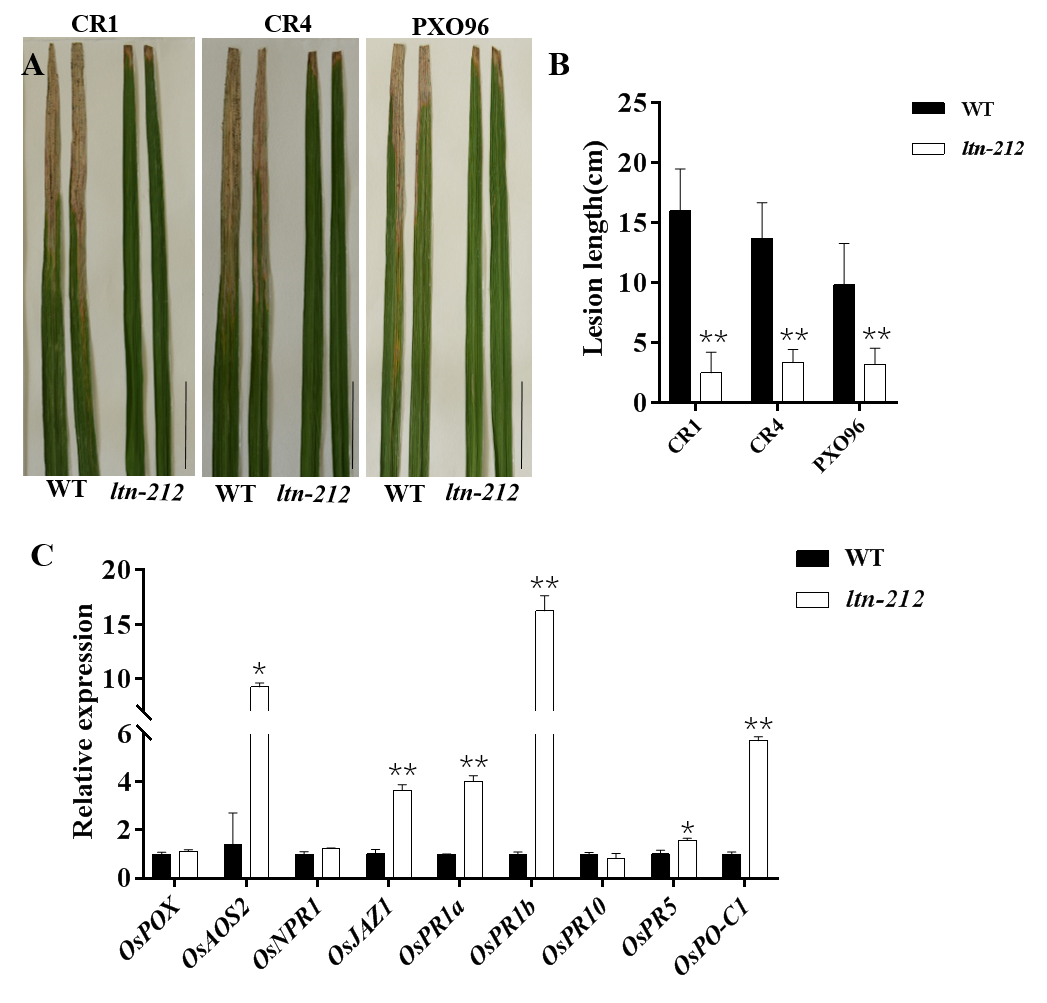
**Figure. 3 Enhanced resistance in *ltn-212* to *Xoo***


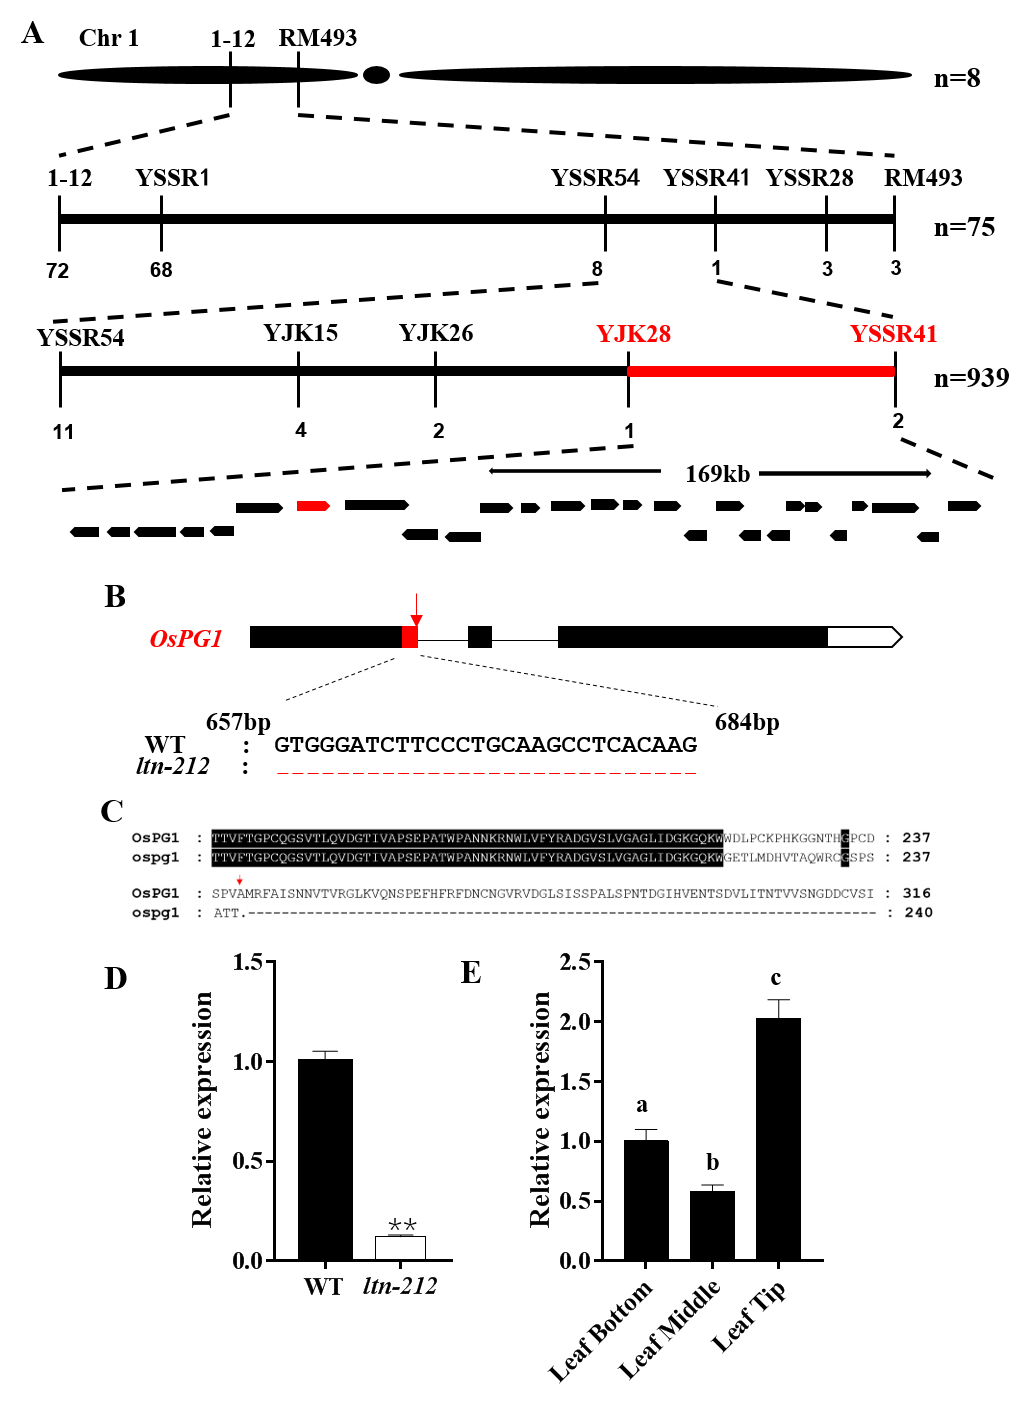
**Figure. 4 Cloning analysis of the *OsPG1***


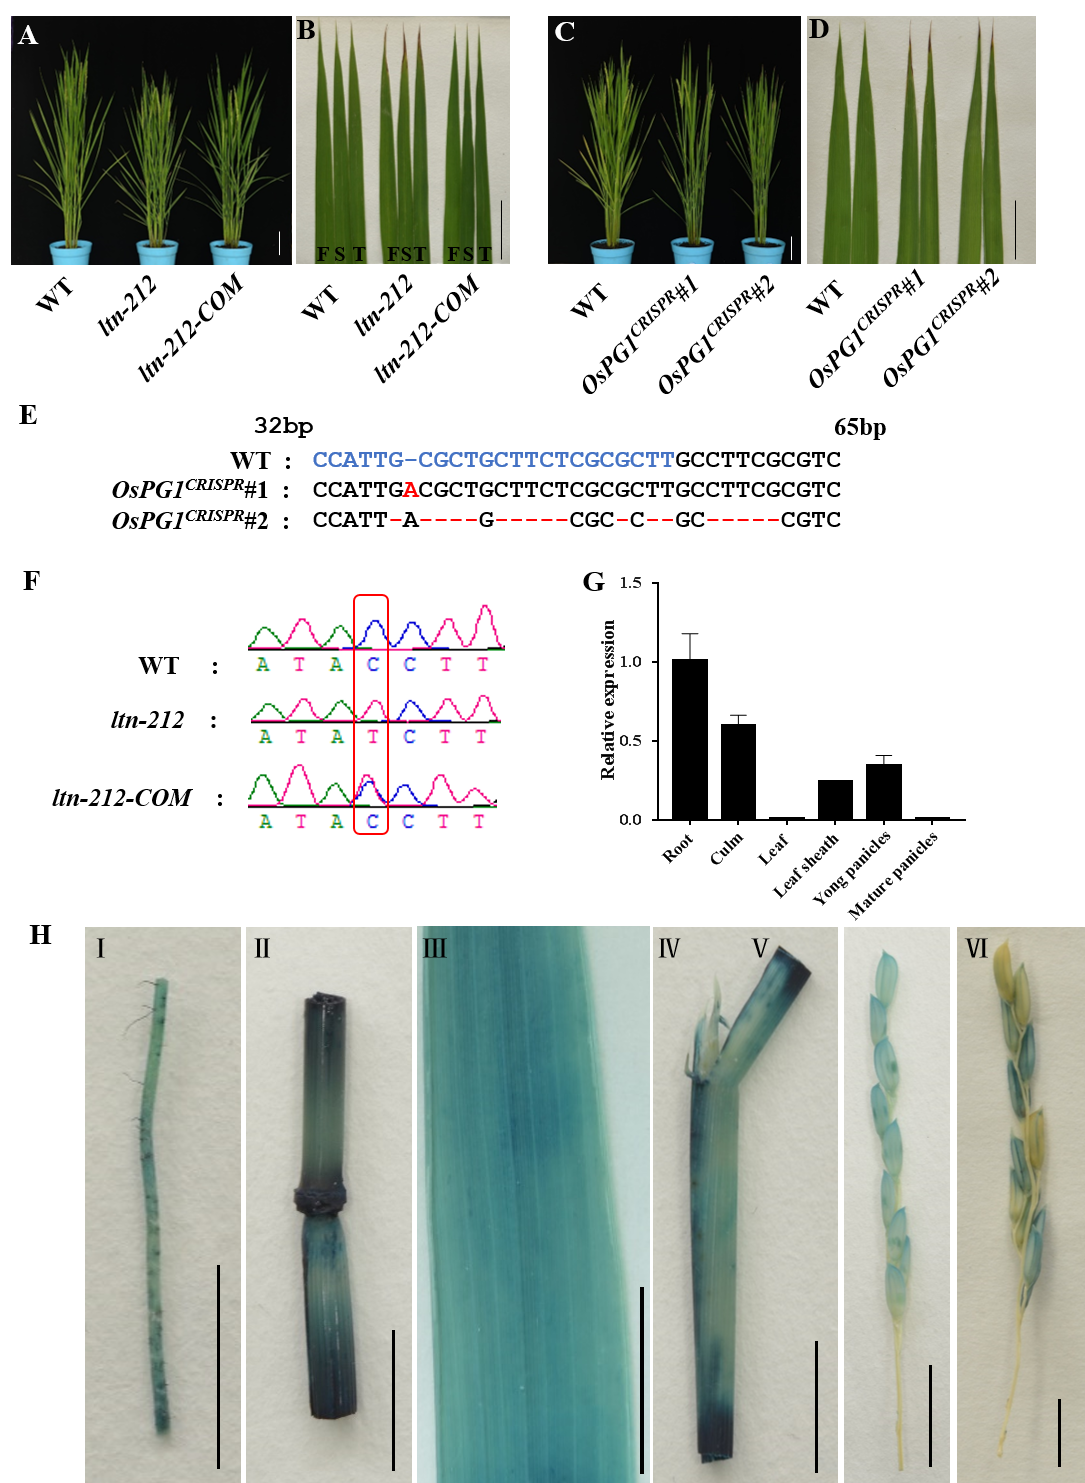


**Figure. 5 Genetic complementation, knock-out and expression analysis of *OsPG1***


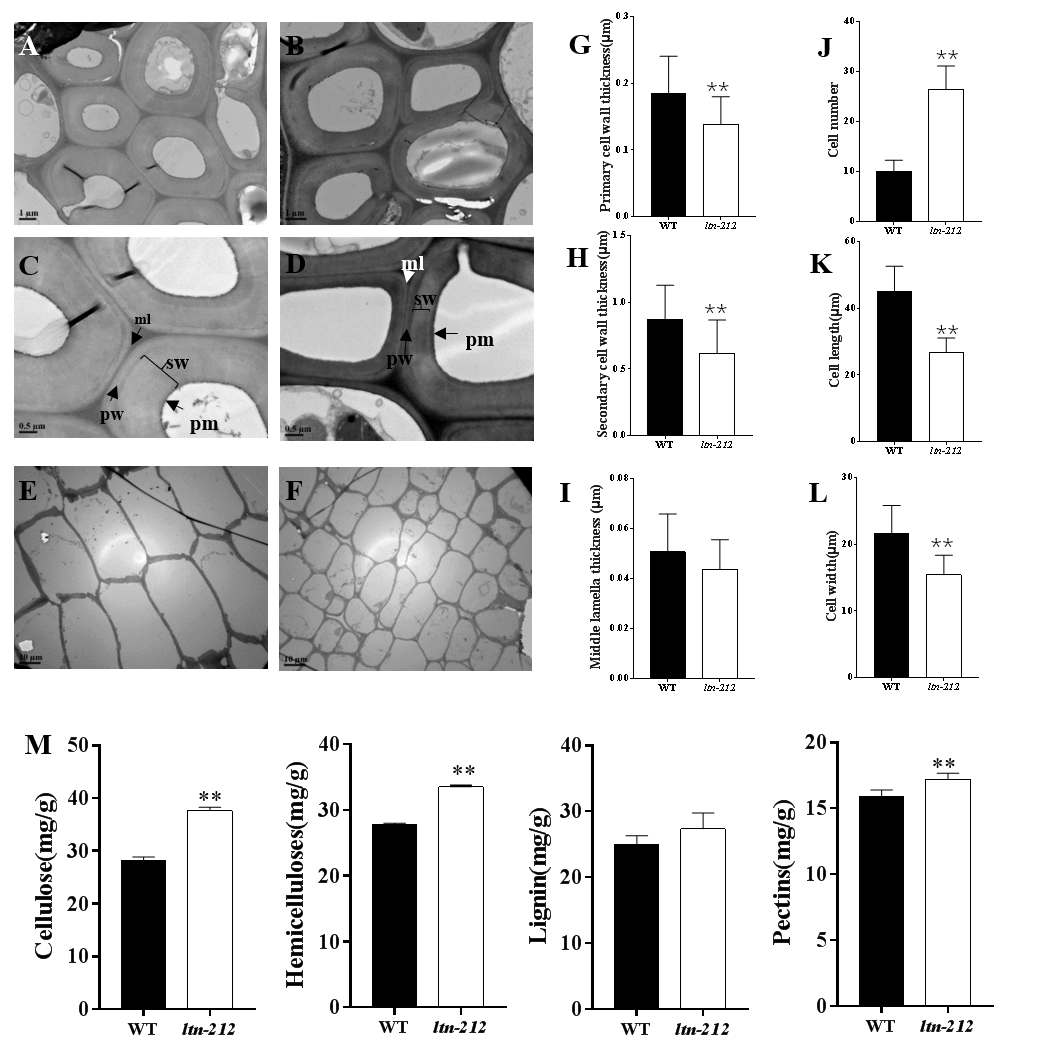


**Figure. 6 Cell wall structure and composition in WT and *ltn-212***


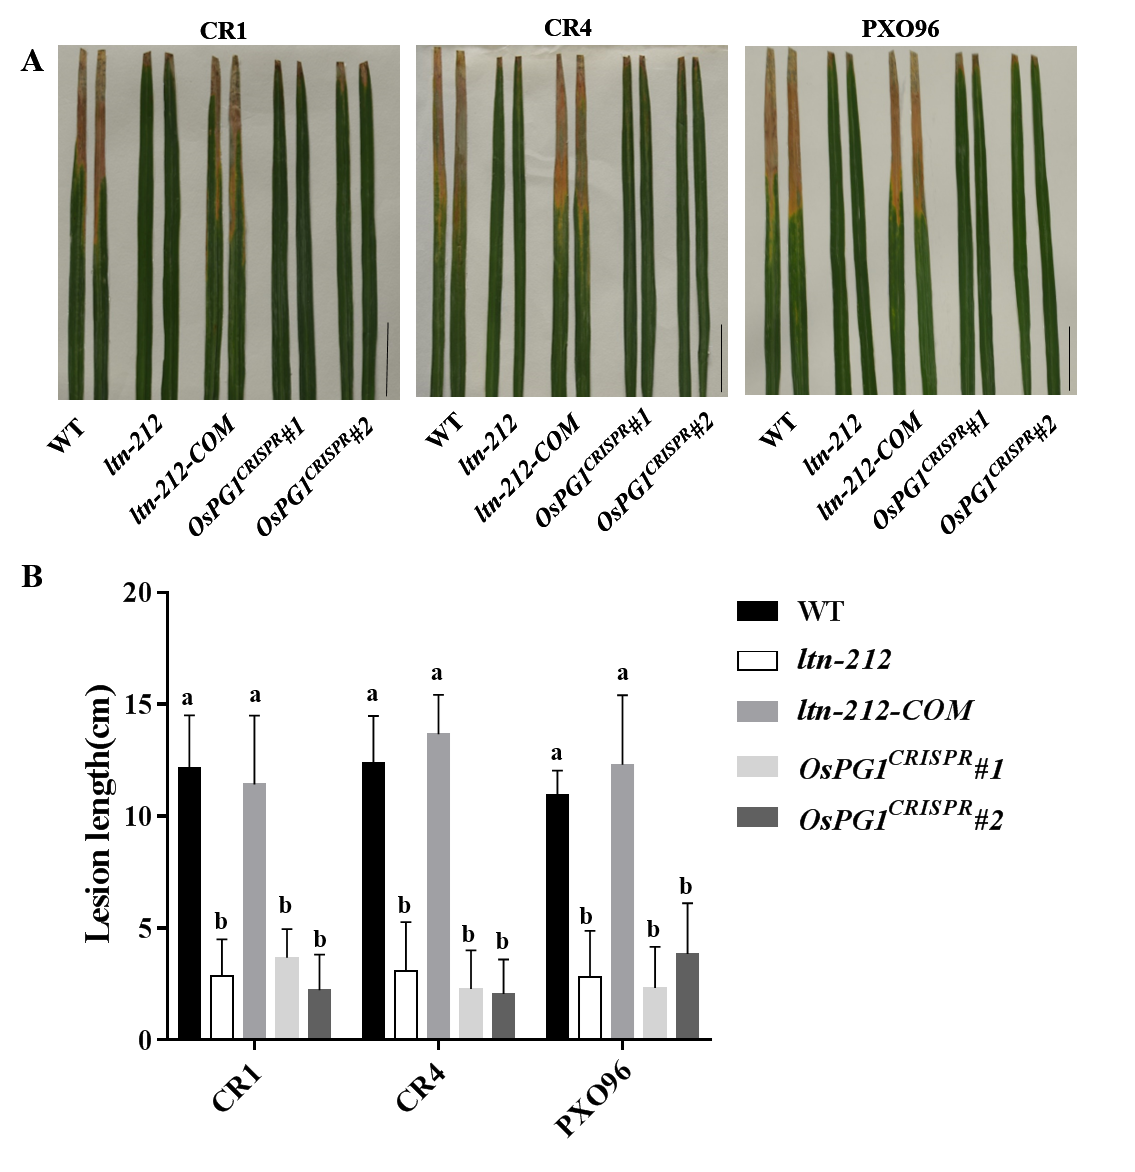
**Figure. 7 Disease reactions of the WT, *ltn-212* and transgene plants to *Xoo***


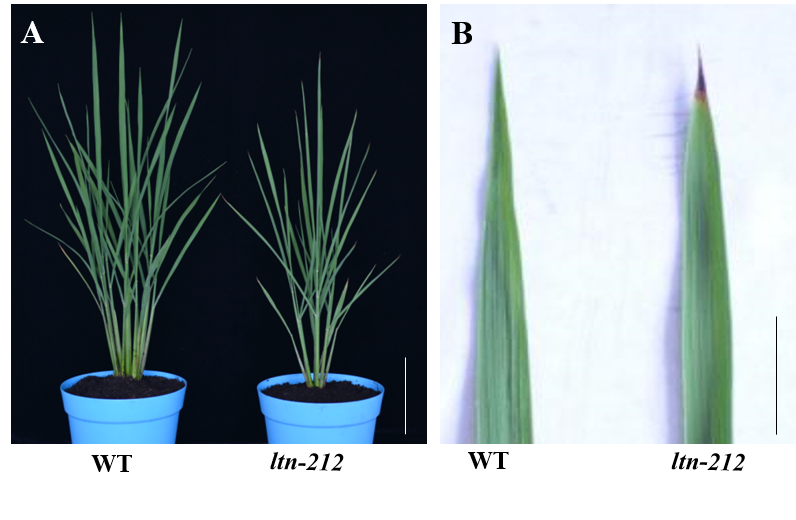
**Additional file 1: Figure. S1 Leaf tip necrosis of *ltn-212* at tillering stage**


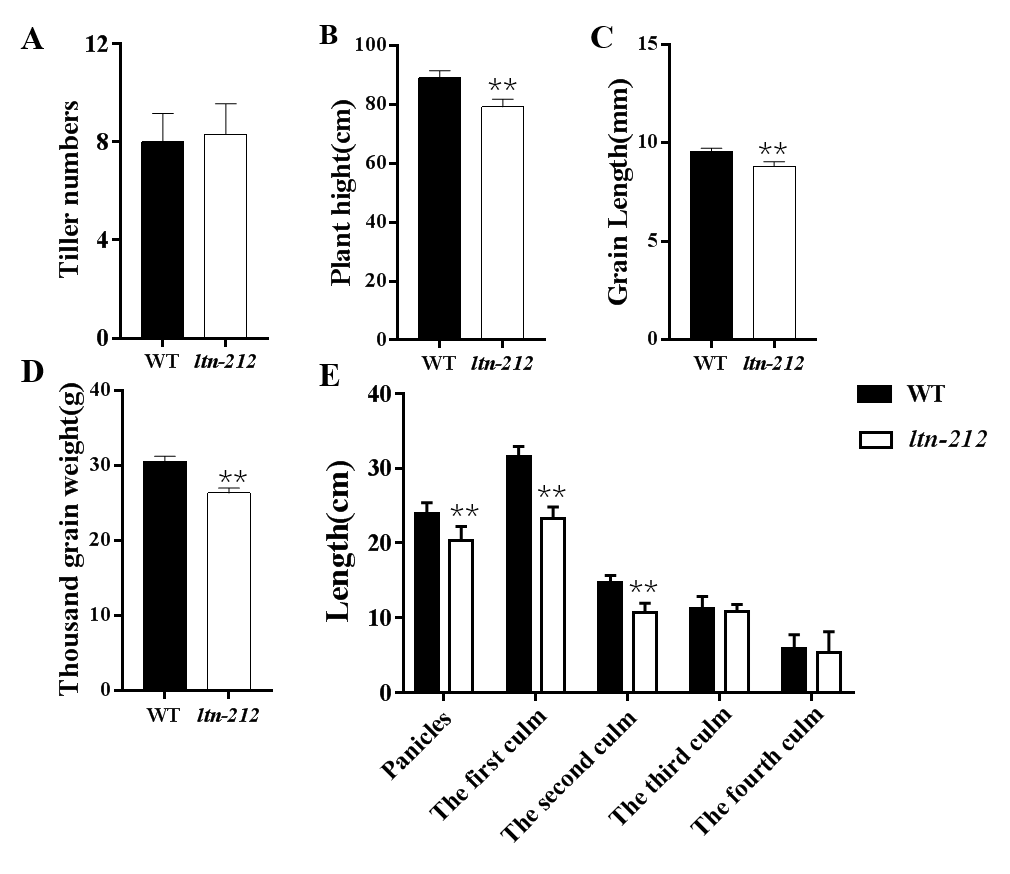


**Additional file 1: Figure. S2 Data statistics of agronomic traits**


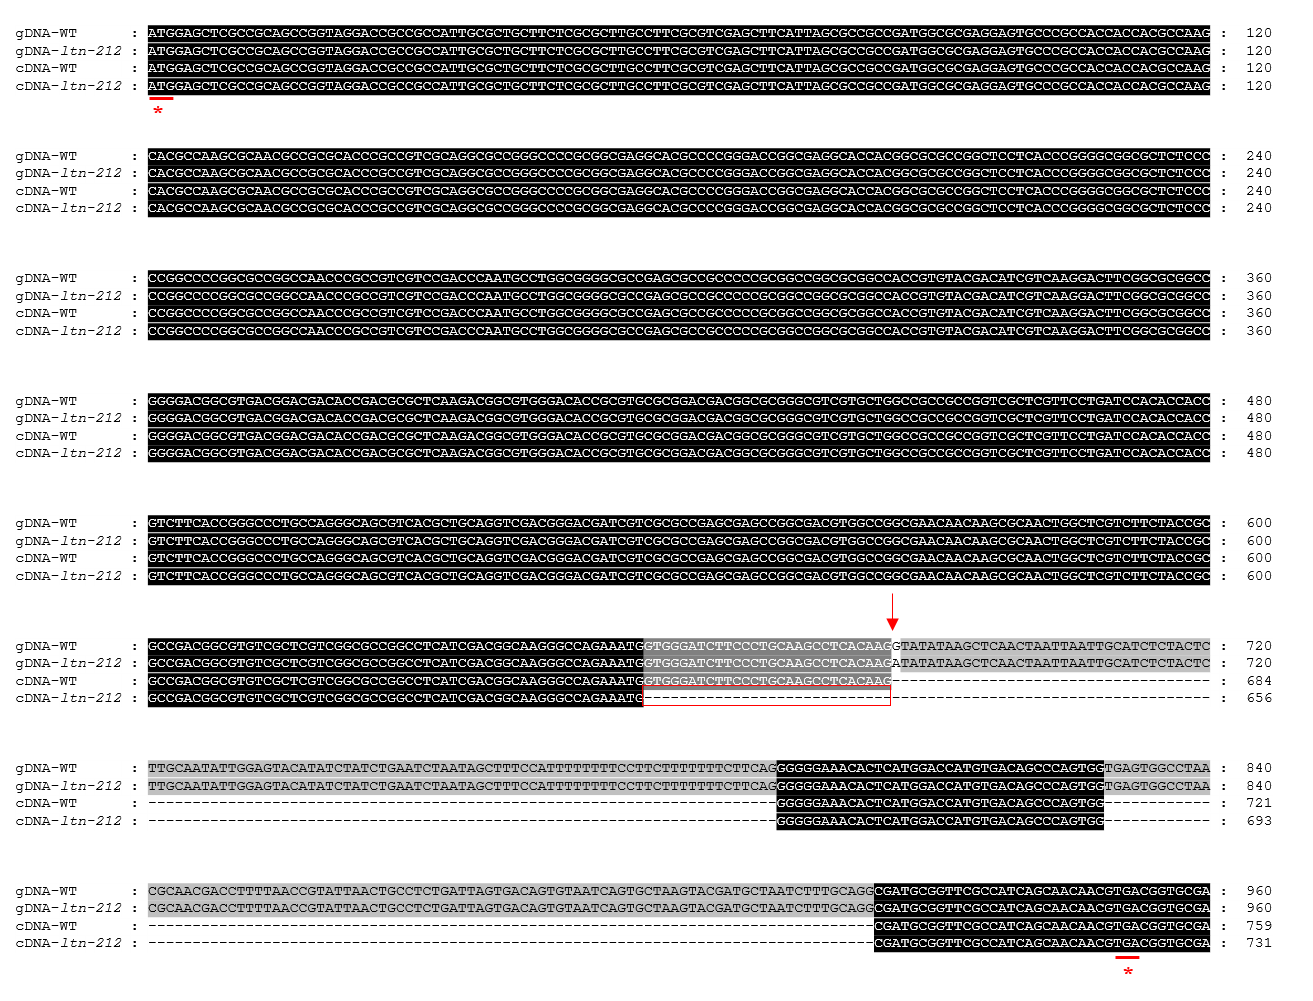
**Additional file 1: Figure. S3 Genome DNA and cDNA alignments between WT and *ltn-212***


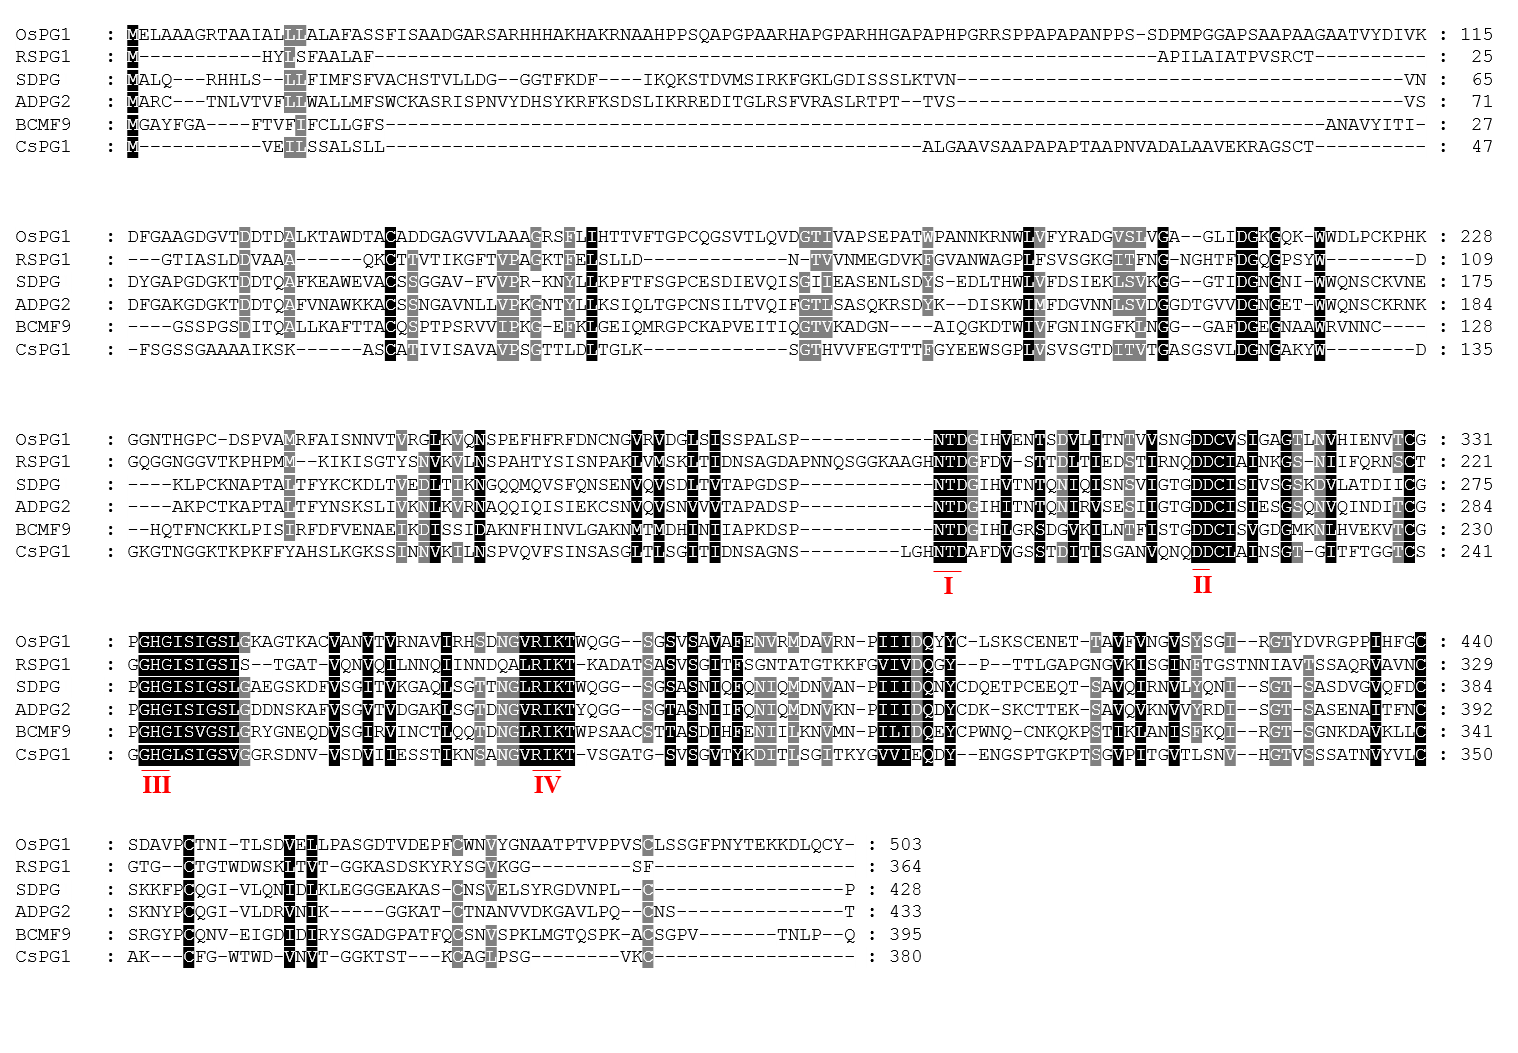
**Additional file 1: Figure. S4 Amino acid sequence alignment of PG homologous**


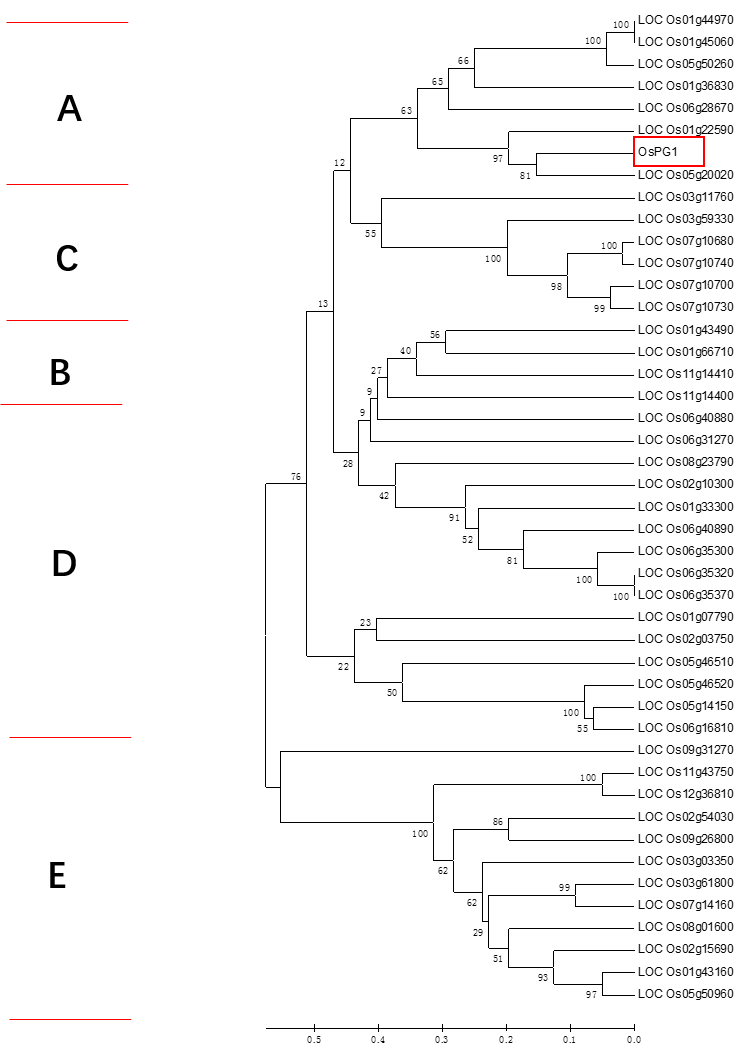


**Additional file 1: Figure. S5 Phylogenetic analysis of *OsPG1* with other homologues in rice**

**
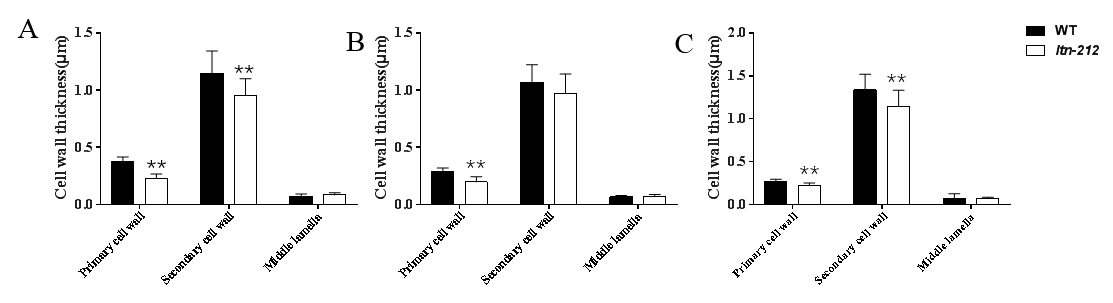
Additional file 1: Figure. S6 Cell wall structure of leaf bottom, middle, and tip.**

**Additional file 1: Table S1. Primers used in this study**

| **Makers** | **Forward primer** | **Reverse primer** |
| --- | --- | --- |
| 1-12 | AAATGGGCTTCCTCCTCTTC | CAGCCTTGATCGGAAGTAGC |
| RM493 | GTACGTAAACGCGGAAGGTGACG | CGACGTACGAGATGCCGATCC |
| YSSR54 | CTATGCCTCCGCCTCTATCTCC | CTCTCTGGACCTACCCGTCATCC |
| YSSR41 | TTTCCCTGGTTTCAAGCTTACG | AGTACGGTACCTTGATGGTAGAAAGG |
| YSSR28 | ATGACTCTTCGCCATTCCATAGC | ACCATGGTCAGCCATCACTAGG |
| YJK15 | ATCCATGACCTGATCCTGAATCC | GACTTGACCAAACCCACAAGTGC |
| YJK26 | ATCCACCACAAACGACATTA | CGTGCAATCGCATTACACTA |
| YJK28  qPOX  qAOS2  qNPR1  qPR10 | GAGTGAATCTACGTTGGCTCAT  GCTCCAAGGTGAACTCCTAATT  AAGCTGCTGCAATACGTGTACTGG  CACTGCACTACGCCGTCGAAC  CGGGCACCATCTACACCA | ATCCTGCTAAAAGTTTGACAATA  ATATGGGTATATGTGGTGTGGC  CGACGAGCAACAGCCTTCCG  TCTCTTCGCCTCGCAGCAA  CGGGCACCATCTACACCA |
| qJAZ1 | GCGCTCCCGGAGATGCCGAT | TTCGCTCGTTGTCGTGATCCTGT |
| qPR1a | CGTGTCGGCGTGGGTGT | GGCGAGTAGTTGCAGGTGATG |
| qPR1b | CATTGCTTTGGCCATGGTAG | GAACCCCAGAAGAGGTTCTC |
| qPR5 | CTTCTGCCCATAATGCATCATC | TGATTATCGATCAAGGTGTCGT |
| qPO-C1 | ATAGCAATGTGTACGTGGAGAT | ATTCCATGCACATACAGATGGA |
| UBQ | GCTCCGTGGCGGTATCAT | CGGCAGTTGACAGCCCTAG |
| *pOsPG1* | CCATGATTACGAATTCAGATGGATAAGGGCGTAAGG | GGCCAGTGCCAAGCTTCCCAA  CTGTTACTGGCTATGAC |
| *OsPG1*-pro | CGGTACCCGGGGATCCAGATGGATAAGGGCGTAAGG | CTCAGATCTACCATGGCACCGC  AGAAACCTATGAAA |
